# Supplementary material
Source: publisher site journal article supplement (https://static.cambridge.org/content/id/urn:cambridge.org:id:article:S0962728600008873/resource/name/Maschat_et_al,_Appendix_Table_1.pdf)
Supplement: Supplementary file 1 [file Maschat_et_al,_Appendix_Table_1.pdf]

**Table 1** Prevalences and frequencies of all (modelled) parameters on Day 3 with total numbers of observations within aggregated scores or count measures (\*) for all combinations of confinement period (CP) and pen-type (PT). Pen-types (PT): F: Flügel, K: Knick, P: Pro Dromi, S: SWAP, T: Trapez. CP 0-sows were not confined; CP 3-sows were crated postpartum for 3 days; sows in CP 4 and CP 6 were crated from a day prior to expected farrowing until day 4 and 6 postpartum, respectively. Total percentage of observations with score 1 indicated for each parameter and respective PT and CP.

|                                  | CP      | PT F                |      | PT K |       | PT P |      | PT S |      | PT T |      | Total %<br>score 1 |
|----------------------------------|---------|---------------------|------|------|-------|------|------|------|------|------|------|--------------------|
|                                  |         | Score/count measure |      |      |       |      |      |      |      |      |      |                    |
|                                  |         | 0                   | 1    | 0    | 1     | 0    | 1    | 0    | 1    | 0    | 1    |                    |
| Injuries head region             | 0       | 37                  | 1    | 35   | 0     | 12   | 0    | 22   | 2    | 36   | 2    | 3.40               |
|                                  | 3       | 39                  | 4    | 28   | 3     | 13   | 3    | 25   | 0    | 35   | 2    | 7.90               |
|                                  | 4       | 38                  | 3    | 29   | 2     | 8    | 2    | 32   | 0    | 32   | 3    | 6.71               |
|                                  | 6       | 41                  | 5    | 33   | 0     | 8    | 0    | 25   | 1    | 43   | 2    | 5.06               |
|                                  | Total % |                     | 7.74 |      | 3.85  |      | 10.9 |      | 2.80 |      | 5.81 |                    |
| Injuries neck                    | 0       | 36                  | 2    | 34   | 1     | 12   | 1    | 24   | 0    | 38   | 0    | 2.70               |
|                                  | 3       | 43                  | 0    | 27   | 4     | 10   | 3    | 24   | 1    | 36   | 1    | 6.04               |
|                                  | 4       | 39                  | 2    | 28   | 3     | 9    | 3    | 32   | 0    | 35   | 0    | 5.30               |
|                                  | 6       | 45                  | 2    | 32   | 1     | 9    | 0    | 27   | 0    | 44   | 1    | 2.48               |
|                                  | Total % |                     | 3.55 |      | 6.923 |      | 14.9 |      | 0.93 |      | 1.29 |                    |
| Injuries back                    | 0       | 34                  | 4    | 31   | 4     | 7    | 6    | 23   | 1    | 37   | 1    | 10.8               |
|                                  | 3       | 40                  | 3    | 24   | 7     | 8    | 5    | 25   | 0    | 33   | 4    | 12.8               |
|                                  | 4       | 38                  | 3    | 24   | 6     | 9    | 3    | 27   | 5    | 34   | 1    | 12.0               |
|                                  | 6       | 40                  | 7    | 22   | 11    | 8    | 1    | 22   | 5    | 40   | 5    | 18.0               |
|                                  | Total % |                     | 10.1 |      | 21.7  |      | 31.9 |      | 10.2 |      | 7.09 |                    |
| Shoulder sore                    | 0       | 35                  | 3    | 29   | 6     | 9    | 4    | 22   | 2    | 32   | 6    | 14.2               |
|                                  | 3       | 37                  | 6    | 28   | 3     | 11   | 2    | 23   | 2    | 31   | 5    | 12.2               |
|                                  | 4       | 38                  | 3    | 22   | 4     | 8    | 3    | 29   | 2    | 32   | 3    | 10.4               |
|                                  | 6       | 44                  | 1    | 28   | 1     | 7    | 2    | 25   | 1    | 35   | 8    | 8.55               |
|                                  | Total % |                     | 7.78 |      | 11.6  |      | 23.9 |      | 6.60 |      | 14.5 |                    |
| Injuries body side               | 0       | 36                  | 2    | 31   | 4     | 10   | 3    | 21   | 3    | 37   | 1    | 8.78               |
|                                  | 3       | 38                  | 5    | 28   | 3     | 5    | 8    | 22   | 2    | 34   | 3    | 14.2               |
|                                  | 4       | 38                  | 3    | 27   | 3     | 7    | 4    | 26   | 6    | 31   | 4    | 13.4               |
|                                  | 6       | 42                  | 4    | 29   | 4     | 6    | 2    | 18   | 7    | 42   | 3    | 12.7               |
|                                  | Total % |                     | 8.33 |      | 10.9  |      | 37.8 |      | 17.1 |      | 7.10 |                    |
| Injuries udder region            | 0       | 25                  | 13   | 23   | 11    | 11   | 2    | 16   | 8    | 30   | 8    | 28.6               |
|                                  | 3       | 28                  | 15   | 16   | 15    | 9    | 4    | 19   | 6    | 17   | 19   | 39.9               |
|                                  | 4       | 19                  | 22   | 17   | 13    | 6    | 6    | 20   | 11   | 23   | 12   | 43.0               |
|                                  | 6       | 21                  | 25   | 17   | 16    | 5    | 3    | 19   | 7    | 32   | 13   | 40.5               |
|                                  | Total % |                     | 44.6 |      | 43.0  |      | 32.6 |      | 30.2 |      | 33.8 |                    |
| Number of injured teats*         | 0       | 14                  | 24   | 22   | 13    | 7    | 6    | 17   | 7    | 24   | 14   | 43.2               |
|                                  | 3       | 21                  | 22   | 13   | 18    | 8    | 5    | 18   | 7    | 22   | 15   | 45.0               |
|                                  | 4       | 7                   | 34   | 12   | 18    | 5    | 7    | 17   | 14   | 15   | 20   | 62.4               |
|                                  | 6       | 23                  | 23   | 18   | 15    | 4    | 4    | 18   | 8    | 23   | 22   | 45.6               |
|                                  | Total % |                     | 61.3 |      | 49.6  |      | 47.8 |      | 34.0 |      | 45.8 |                    |
| Number of partial/missing teats* | 0       | 37                  | 1    | 32   | 2     | 12   | 1    | 24   | 0    | 36   | 2    | 4.08               |
|                                  | 3       | 40                  | 3    | 29   | 2     | 12   | 1    | 25   | 0    | 35   | 2    | 5.37               |
|                                  | 4       | 40                  | 1    | 29   | 1     | 10   | 2    | 30   | 1    | 34   | 1    | 4.03               |
|                                  | 6       | 45                  | 1    | 32   | 1     | 8    | 0    | 24   | 2    | 44   | 1    | 3.17               |
|                                  | Total % |                     | 3.6  |      | 4.69  |      | 8.70 |      | 2.8  |      | 3.9  |                    |

|                     | CP      | PT F                |      | PT K |      | PT P |      | PT S |      | PT T |      | Total %<br>score 1 |
|---------------------|---------|---------------------|------|------|------|------|------|------|------|------|------|--------------------|
|                     |         | Score/count measure |      |      |      |      |      |      |      |      |      |                    |
|                     |         | 0                   | 1    | 0    | 1    | 0    | 1    | 0    | 1    | 0    | 1    |                    |
| Injuries vulva      | 0       | 38                  | 0    | 35   | 0    | 9    | 0    | 23   | 1    | 37   | 1    | 1.39               |
|                     | 3       | 41                  | 2    | 31   | 0    | 11   | 0    | 25   | 0    | 37   | 0    | 1.36               |
|                     | 4       | 40                  | 1    | 30   | 1    | 11   | 0    | 31   | 1    | 33   | 2    | 3.33               |
|                     | 6       | 47                  | 0    | 32   | 1    | 8    | 0    | 27   | 0    | 45   | 0    | 0.63               |
|                     | Total % |                     | 1.78 |      | 1.54 |      | 0.00 |      | 1.85 |      | 1.94 |                    |
| Injuries legs       | 0       | 37                  | 1    | 33   | 2    | 12   | 0    | 24   | 0    | 37   | 1    | 2.72               |
|                     | 3       | 38                  | 5    | 28   | 3    | 11   | 2    | 22   | 2    | 36   | 1    | 8.78               |
|                     | 4       | 40                  | 1    | 29   | 2    | 9    | 2    | 31   | 1    | 33   | 2    | 5.33               |
|                     | 6       | 42                  | 3    | 31   | 2    | 8    | 0    | 26   | 0    | 43   | 2    | 4.46               |
|                     | Total % |                     | 5.99 |      | 6.92 |      | 9.09 |      | 2.83 |      | 3.87 |                    |
| Swellings hind legs | 0       | 37                  | 1    | 34   | 1    | 12   | 1    | 24   | 0    | 37   | 1    | 2.70               |
|                     | 3       | 41                  | 2    | 31   | 0    | 11   | 1    | 25   | 0    | 35   | 2    | 3.38               |
|                     | 4       | 40                  | 1    | 31   | 0    | 9    | 3    | 31   | 1    | 35   | 0    | 3.31               |
|                     | 6       | 46                  | 1    | 33   | 0    | 8    | 0    | 26   | 1    | 45   | 0    | 1.25               |
|                     | Total % |                     | 2.96 |      | 0.77 |      | 11.1 |      | 1.85 |      | 1.94 |                    |
| Changes claw horn   | 0       | 37                  | 1    | 31   | 4    | 8    | 3    | 22   | 2    | 35   | 2    | 8.28               |
|                     | 3       | 35                  | 3    | 28   | 3    | 6    | 5    | 23   | 2    | 30   | 5    | 12.9               |
|                     | 4       | 38                  | 2    | 26   | 5    | 7    | 3    | 28   | 3    | 32   | 1    | 9.66               |
|                     | 6       | 42                  | 3    | 28   | 5    | 7    | 1    | 23   | 3    | 44   | 1    | 8.28               |
|                     | Total % |                     | 5.59 |      | 13.1 |      | 30.0 |      | 9.43 |      | 6.00 |                    |
| Lameness            | 0       | 37                  | 1    | 34   | 1    | 11   | 2    | 24   | 0    | 38   | 0    | 2.70               |
|                     | 3       | 41                  | 2    | 30   | 1    | 11   | 1    | 24   | 1    | 34   | 3    | 5.41               |
|                     | 4       | 39                  | 2    | 31   | 0    | 7    | 3    | 29   | 3    | 35   | 0    | 5.37               |
|                     | 6       | 42                  | 4    | 32   | 1    | 8    | 1    | 26   | 0    | 43   | 2    | 5.03               |
|                     | Total % |                     | 5.36 |      | 2.31 |      | 15.9 |      | 3.74 |      | 3.23 |                    |
